# Supplementary material for: Socioeconomic determinants of leprosy new case detection in the 100 Million Brazilian Cohort: a population-based linkage study
Source: PubMed Central journal article supplement (PMC6688099; doi:10.1016/s2214-109x(19)30260-8), 2019-07-19
Supplement: mmc1.pdf [file mmc1.pdf]

# THE LANCET

## Global Health

### Supplementary appendix

This appendix formed part of the original submission and has been peer reviewed. We post it as supplied by the authors.

Supplement to: Nery JS, Ramond A, Pescarini JM. Socioeconomic determinants of leprosy new case detection in the 100 Million Brazilian Cohort: a population-based linkage study. *Lancet Glob Health* 2019; published online July 19. [http://dx.doi.org/10.1016/S2214-109X\(19\)30260-8](http://dx.doi.org/10.1016/S2214-109X(19)30260-8).

## Supplementary material

**Supplementary Table 1 Association of employment with leprosy in participants >18y, stratified by time period of registration.**

| Age groups (y)                          | Currently employed | Unemployed student |         | Unemployed        |         |
|-----------------------------------------|--------------------|--------------------|---------|-------------------|---------|
|                                         |                    | IRR (95%CI)        | P-value | IRR (95%CI)       | P-value |
| <b>CadÚnico registration: 2007-2009</b> |                    |                    |         |                   |         |
| 18-30                                   | Ref                | 0.86 (0.80, 0.92)  | <0.001  | 0.79 (0.71, 0.89) | <0.001  |
| 30-40                                   | Ref                | 0.90 (0.82, 0.98)  | 0.01    | 1.04 (0.91, 1.19) | 0.57    |
| 40-50                                   | Ref                | 0.91 (0.82, 1.01)  | 0.07    | 1.18 (1.03, 1.36) | 0.02    |
| 50-60                                   | Ref                | 0.78 (0.70, 0.88)  | <0.001  | 1.08 (0.95, 1.23) | 0.23    |
| >60                                     | Ref                | 0.69 (0.61, 0.78)  | <0.001  | 0.78 (0.63, 0.82) | <0.001  |
| <b>CadÚnico registration: 2011-2014</b> |                    |                    |         |                   |         |
| 18-30                                   | Ref                | 0.86 (0.80, 0.92)  | <0.001  | 0.74 (0.71, 0.89) | <0.001  |
| 30-40                                   | Ref                | 0.89 (0.37, 2.15)  | 0.79    | 1.06 (0.90, 1.26) | 0.47    |
| 40-50                                   | Ref                | 0.33 (0.05, 2.37)  | 0.27    | 1.06 (0.88, 1.27) | 0.53    |
| 50-60                                   | Ref                | 1.02 (0.33, 3.19)  | 0.97    | 0.88 (0.75, 1.03) | 0.12    |
| >60                                     | Ref                | 1.52 (0.48, 4.81)  | 0.48    | 1.07 (0.85, 1.37) | 0.53    |

IRR: incidence rate ratio for leprosy new case detection

IRRs were obtained using generalized linear Poisson models with clustered standard errors to account for clustering by family. As the questionnaire used to record employment changed in 2010, the analysis is stratified from 2007-2009 and 2011-2014.

**Supplementary Figure 1 Forest plot of multivariate association of distal and intermediate socio-demographic determinants with paucibacillary and multibacillary leprosy**

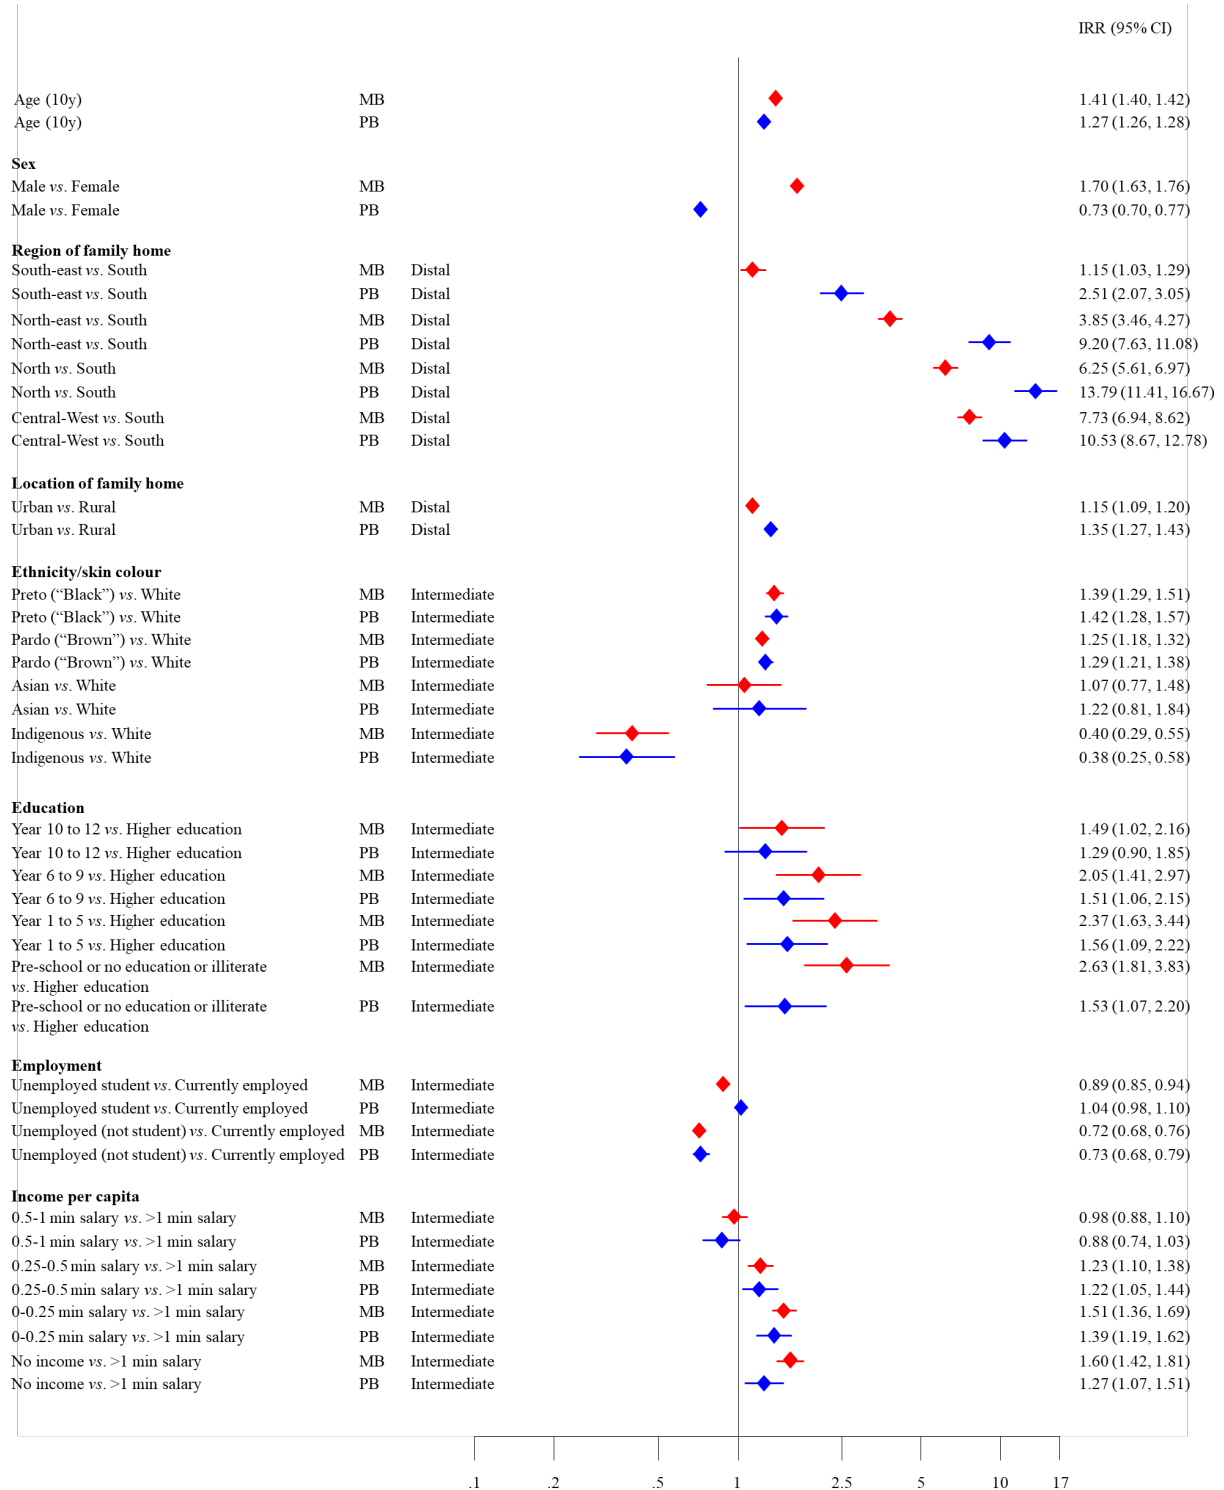

IRR: incidence rate ratio for leprosy new case detection, MB: multibacillary, PB: paucibacillary  
 IRRs were obtained using generalized linear Poisson models with clustered standard errors to account for clustering by family. A complete case analysis approach was adopted excluding individuals with missing data in any of the three models from all models.

**Supplementary Figure 2 Forest plot of multivariate association of proximal socio-demographic determinants with paucibacillary and multibacillary leprosy**

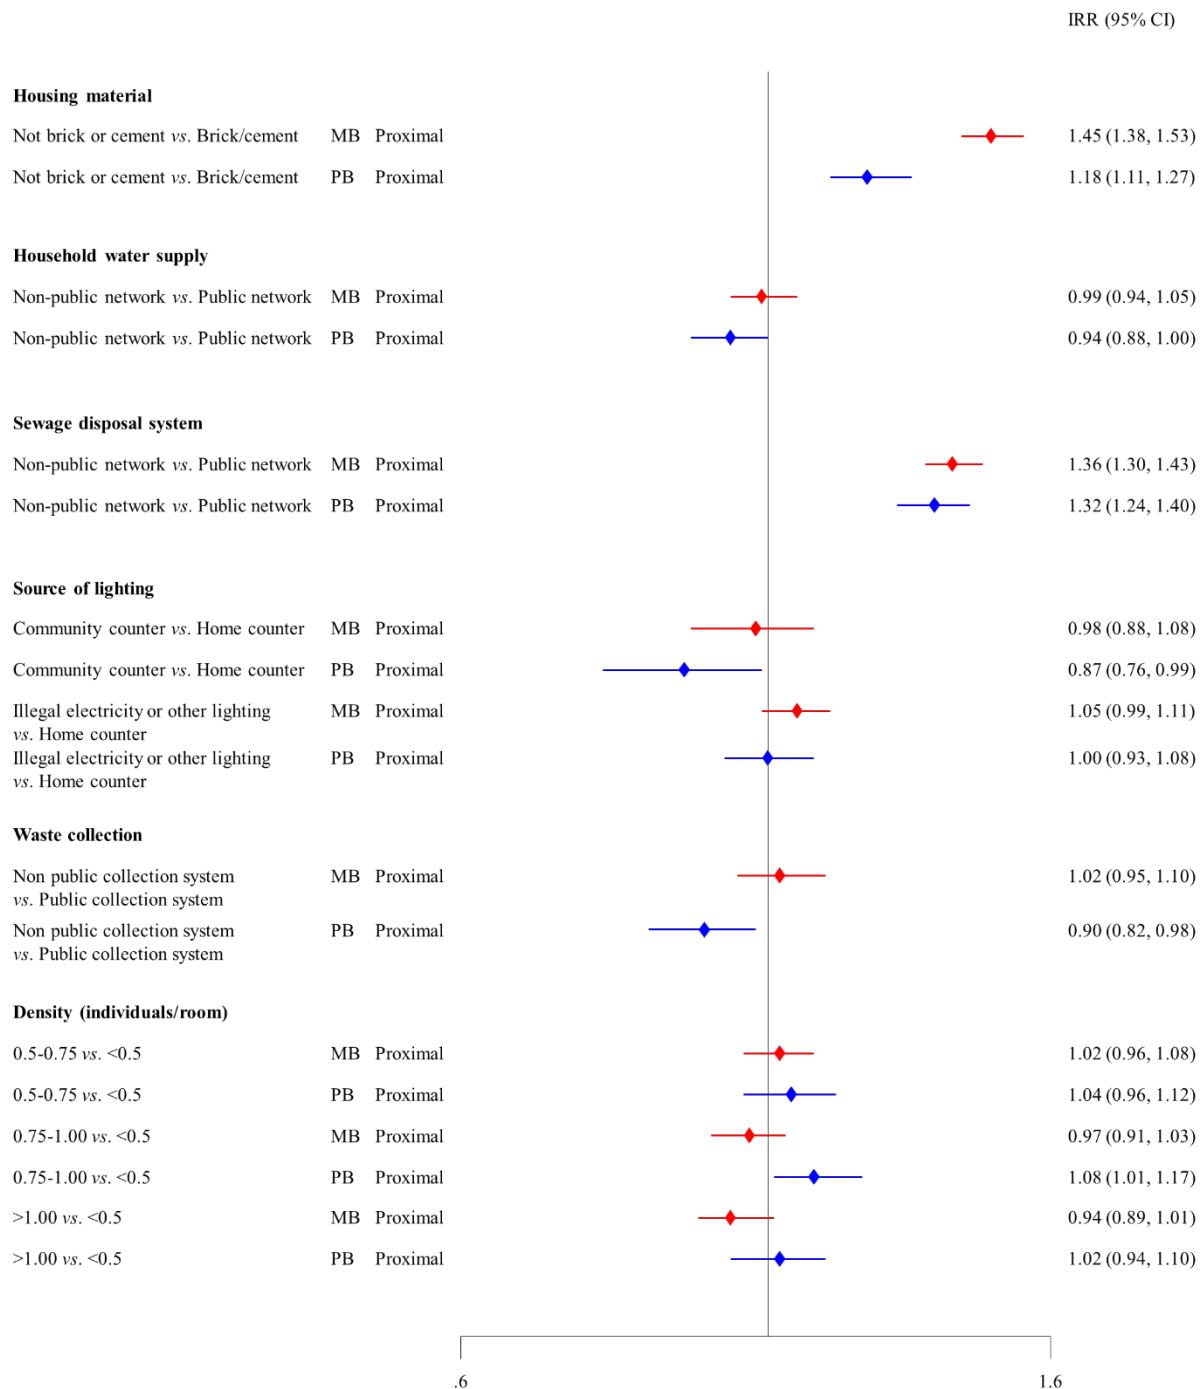

IRR: incidence rate ratio for leprosy new case detection, MB: multibacillary, PB: paucibacillary  
 IRRs were obtained using generalized linear Poisson models with clustered standard errors to account for clustering by family. A complete case analysis approach was adopted excluding individuals with missing data in any of the three models from all models.

**Supplementary Figure 3 Forest-plot of multivariate association of distal and intermediate socio-demographic determinants with leprosy by region of residence**

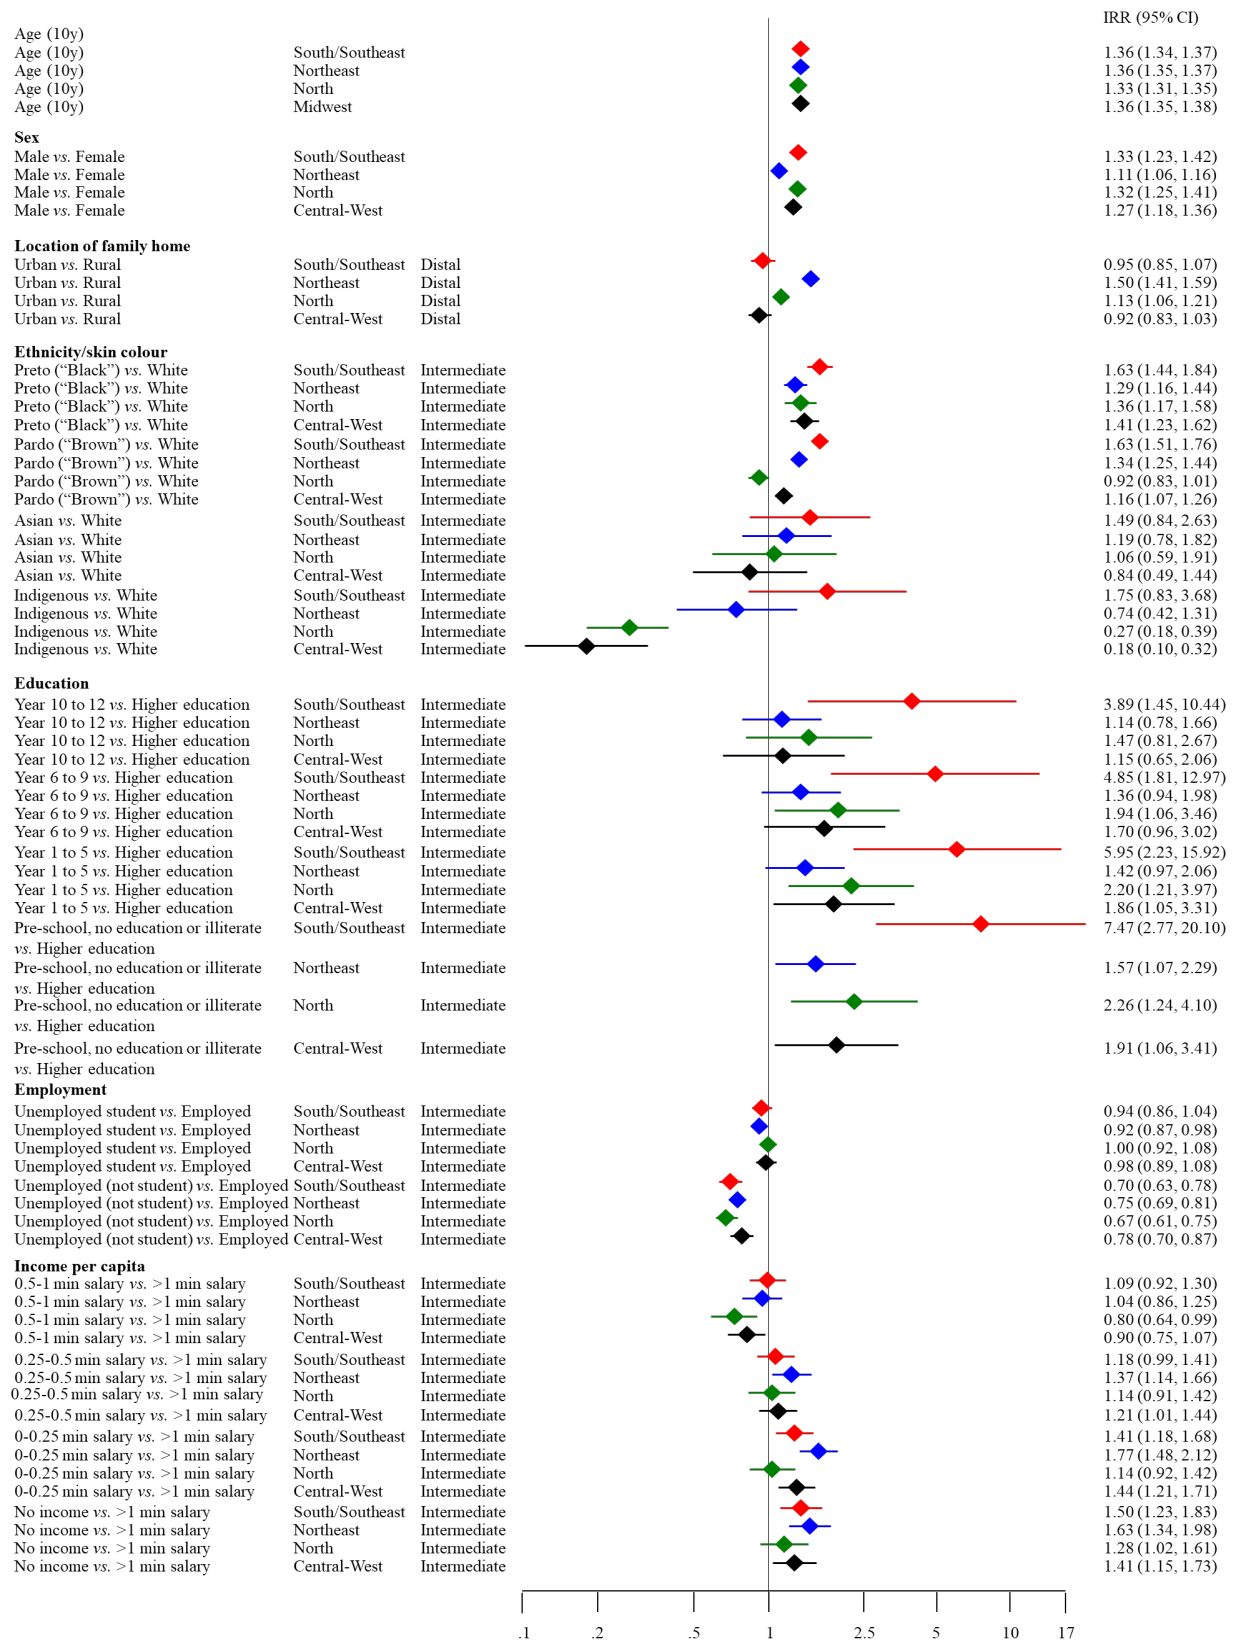

IRR: incidence rate ratio for leprosy new case detection. IRRs were obtained using generalized linear Poisson models with clustered standard errors to account for clustering by family. A complete case analysis approach was adopted excluding individuals with missing data in any of the three models from all models.

## Supplementary Figure 4 Forest-plot of multivariate association of proximal socio-demographic determinants with leprosy by region of residence

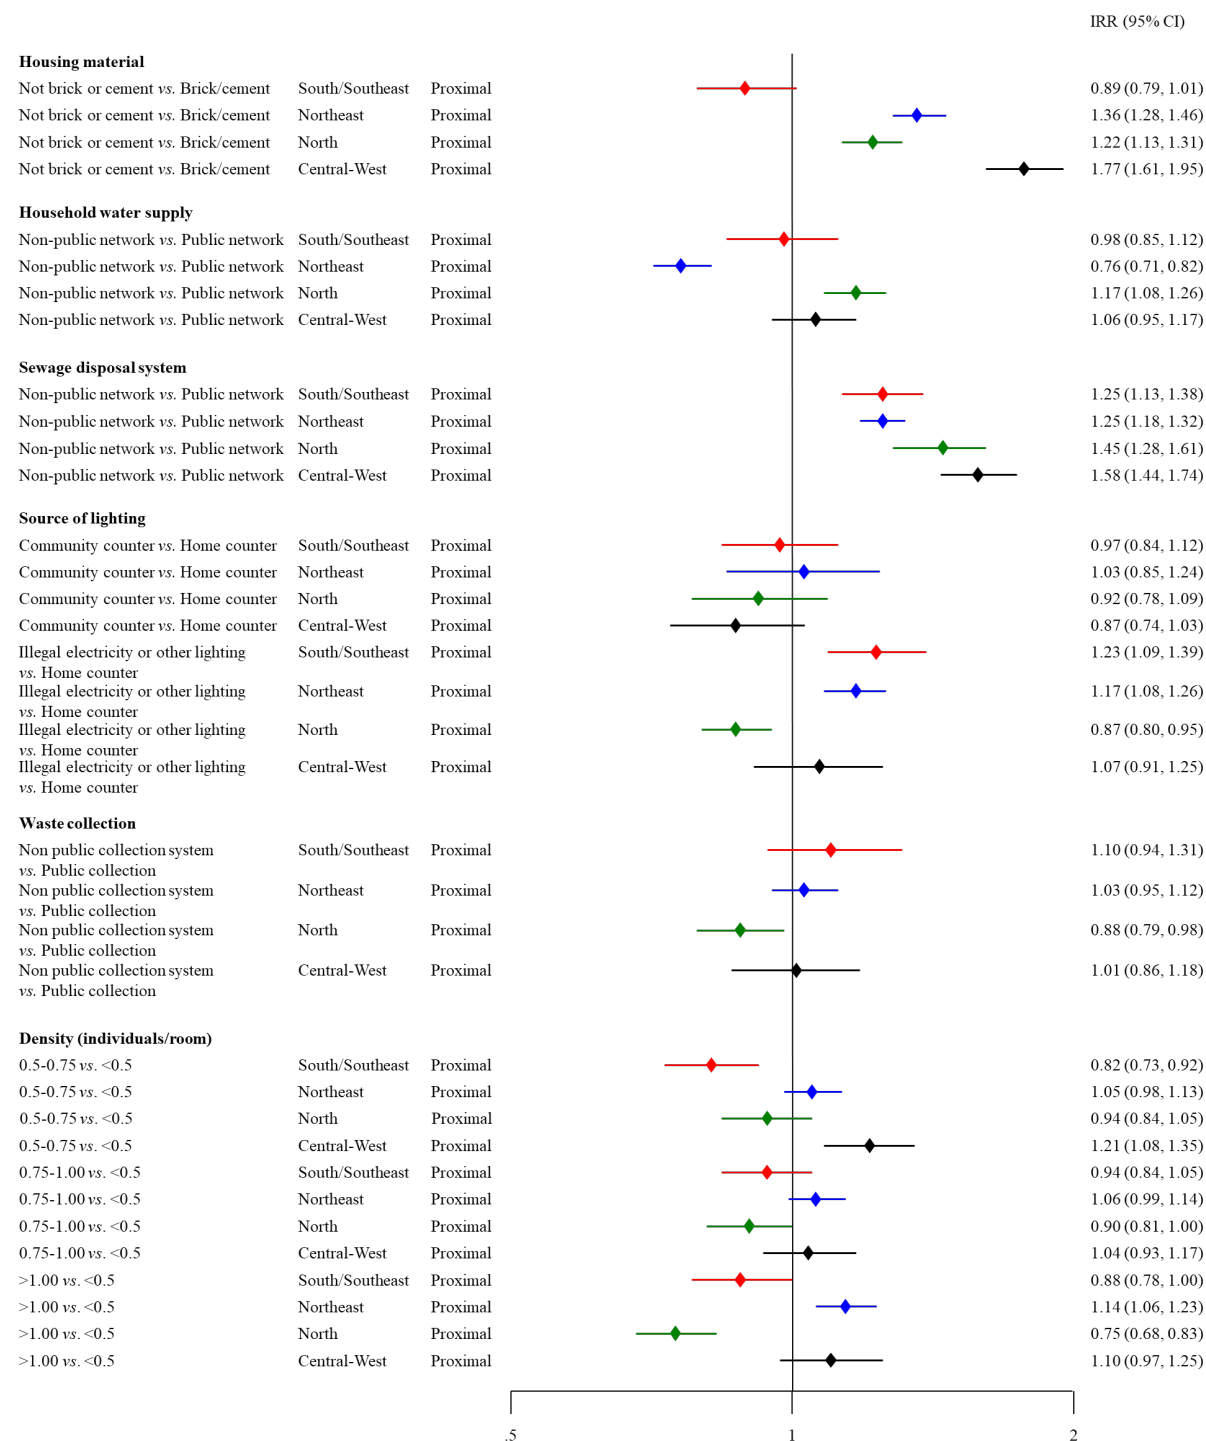

IRR: incidence rate ratio for leprosy new case detection. IRRs were obtained using generalized linear Poisson models with clustered standard errors to account for clustering by family. A complete case analysis approach was adopted excluding individuals with missing data in any of the three models from all models.

**Supplementary Table 2 Multivariate hierarchical association of socioeconomic factors with leprosy incidence adjusting for year of entry into the 100 Million Brazilian cohort**

| Variable                                 | Model 1           |         | Model 2 *         |         | Model 3 **        |         |
|------------------------------------------|-------------------|---------|-------------------|---------|-------------------|---------|
|                                          | IRR               | P-value | IRR               | P-value | IRR               | P-value |
| <b>Age (per 10y)</b>                     | 1.32 (1.32, 1.33) | <0.001  | 1.35 (1.34, 1.36) | <0.001  | 1.36 (1.35, 1.36) | <0.001  |
| <b>Sex</b>                               |                   |         |                   |         |                   |         |
| Female                                   | Ref               |         |                   |         |                   |         |
| Male                                     | 1.25 (1.21, 1.28) | <0.001  | 1.22 (1.19, 1.26) | <0.001  | 1.22 (1.19, 1.26) | <0.001  |
| <b>Year at baseline</b>                  |                   |         |                   |         |                   |         |
| 2007                                     | Ref               |         | Ref               |         | Ref               |         |
| 2008                                     | 0.82 (0.79, 0.86) | <0.001  | 0.85 (0.82, 0.89) | <0.001  | 0.87 (0.83, 0.90) | <0.001  |
| 2009                                     | 0.81 (0.78, 0.85) | <0.001  | 0.84 (0.80, 0.88) | <0.001  | 0.86 (0.82, 0.91) | <0.001  |
| 2010                                     | 0.77 (0.72, 0.82) | <0.001  | 0.80 (0.75, 0.86) | <0.001  | 0.83 (0.77, 0.88) | <0.001  |
| 2011                                     | 0.62 (0.57, 0.66) | <0.001  | 0.73 (0.68, 0.79) | <0.001  | 0.75 (0.70, 0.81) | <0.001  |
| 2012                                     | 0.55 (0.52, 0.59) | <0.001  | 0.67 (0.59, 0.72) | <0.001  | 0.69 (0.65, 0.74) | <0.001  |
| 2013                                     | 0.54 (0.49, 0.60) | <0.001  | 0.65 (0.59, 0.72) | <0.001  | 0.67 (0.61, 0.75) | <0.001  |
| 2014                                     | 0.60 (0.53, 0.68) | <0.001  | 0.74 (0.64, 0.85) | <0.001  | 0.76 (0.67, 0.88) | <0.001  |
| <b>Distal variables</b>                  |                   |         |                   |         |                   |         |
| <b>Region of family home</b>             |                   |         |                   |         |                   |         |
| South                                    | Ref               |         |                   |         |                   |         |
| South-east                               | 1.43 (1.30, 1.58) | <0.001  |                   |         |                   |         |
| North-east                               | 4.71 (4.30, 5.16) | <0.001  |                   |         |                   |         |
| North                                    | 7.47 (6.80, 8.20) | <0.001  |                   |         |                   |         |
| Central-West                             | 8.30 (7.55, 9.13) | <0.001  |                   |         |                   |         |
| <b>Location of family home</b>           |                   |         |                   |         |                   |         |
| Rural                                    | Ref               |         |                   |         |                   |         |
| Urban                                    | 1.28 (1.23, 1.33) | <0.001  |                   |         |                   |         |
| <b>Intermediate variables</b>            |                   |         |                   |         |                   |         |
| <b>Ethnicity/skin colour</b>             |                   |         |                   |         |                   |         |
| White                                    |                   |         | Ref               |         |                   |         |
| Preto (“Black”)                          |                   |         | 1.40 (1.31, 1.49) | <0.001  |                   |         |
| Pardo (“Brown”)                          |                   |         | 1.26 (1.21, 1.32) | <0.001  |                   |         |
| Asian                                    |                   |         | 1.18 (0.91, 1.52) | 0.21    |                   |         |
| Indigenous                               |                   |         | 0.39 (0.30, 0.51) | <0.001  |                   |         |
| <b>Highest level of education***</b>     |                   |         |                   |         |                   |         |
| Higher education                         |                   |         | Ref               |         |                   |         |
| Year 10 to 12                            |                   |         | 1.48 (1.13, 1.94) | 0.004   |                   |         |
| Year 6 to 9                              |                   |         | 1.79 (1.37, 2.34) | <0.001  |                   |         |
| Year 1 to 5                              |                   |         | 1.96 (1.50, 2.56) | <0.001  |                   |         |
| Pre-school or no education or illiterate |                   |         | 1.94 (1.48, 2.54) | <0.001  |                   |         |
| <b>Employment***</b>                     |                   |         |                   |         |                   |         |
| Currently employed                       |                   |         | Ref               |         |                   |         |
| Unemployed student                       |                   |         | 0.90 (0.87, 0.94) | <0.001  |                   |         |
| Unemployed (not student)                 |                   |         | 0.81 (0.77, 0.85) | <0.001  |                   |         |
| <b>Income per capita</b>                 |                   |         |                   |         |                   |         |
| >1 min salary                            |                   |         | Ref               |         |                   |         |
| 0.5-1 min salary                         |                   |         | 0.96 (0.88, 1.06) | 0.45    |                   |         |
| 0.25-0.5 min salary                      |                   |         | 1.20 (1.09, 1.32) | <0.001  |                   |         |
| 0-0.25 min salary                        |                   |         | 1.38 (1.26, 1.52) | <0.001  |                   |         |

|                                                    |                   |                   |        |
|----------------------------------------------------|-------------------|-------------------|--------|
| No income                                          | 1.41 (1.28, 1.56) | <0.001            |        |
| <b>Proximal variables</b>                          |                   |                   |        |
| <b>Housing material</b>                            |                   |                   |        |
| Brick or cement                                    |                   | Ref               |        |
| Taipa/Wood/Other                                   |                   | 1.32 (1.27, 1.38) | <0.001 |
| <b>Household water supply</b>                      |                   |                   |        |
| Public network                                     |                   | Ref               |        |
| Well/Natural source/Cistern/Other                  |                   | 0.97 (0.93, 1.01) | 0.12   |
| <b>Sewage disposal system</b>                      |                   |                   |        |
| Public network                                     |                   | Ref               |        |
| Septic tank/Ditch/Other                            |                   | 1.34 (1.29, 1.39) | <0.001 |
| <b>Electricity in family home</b>                  |                   |                   |        |
| Home counter                                       |                   | Ref               |        |
| Community counter                                  |                   | 0.96 (0.88, 1.04) | 0.31   |
| Illegal electricity/Gas lighting/Candlelight/Other |                   | 1.03 (0.98, 1.08) | 0.18   |
| <b>Waste collection system</b>                     |                   |                   |        |
| Public collection system                           |                   | Ref               |        |
| Burned/Buried/Outdoor disposal/Other               |                   | 0.97 (0.91, 1.02) | 0.17   |
| <b>Density (individuals/room)</b>                  |                   |                   |        |
| <=0.5                                              |                   | Ref               |        |
| 0.5-0.75                                           |                   | 1.01 (0.96, 1.06) | 0.66   |
| 0.75-1.00                                          |                   | 0.99 (0.94, 1.04) | 0.69   |
| >1.00                                              |                   | 0.94 (0.89, 0.98) | 0.008  |

IRR: incidence rate ratio for leprosy new case detection

IRRs were obtained using generalized linear Poisson models with clustered standard errors to account for clustering by family. A complete case analysis approach was adopted excluding individuals with missing data in any of the three models from all models.

\*Model 2: covariates in Model 2 are adjusted for covariates from Model 1 with a p-value<0.1, i.e. Model 2 is adjusted for region and location of family home

\*\*Model 3: covariates from Model 3 are adjusted for covariates from Model 1 and Model 2 with a p-value<0.1, i.e. Model 3 is adjusted for region, location of family home, ethnicity, education, employment, and income

\*\*\*Information on education and employment are reported at the individual level for adult individuals (>18y) and for the oldest member of the family for individuals aged under 18y



**Supplementary Table 3 Multivariate hierarchical association of socioeconomic factors with leprosy incidence restricted to 2 years of follow-up (N=23,670,871)**

| Variable                                 | Model 1           |         | Model 2 *         |         | Model 3 **        |         |
|------------------------------------------|-------------------|---------|-------------------|---------|-------------------|---------|
|                                          | IRR               | P-value | IRR               | P-value | IRR               | P-value |
| <b>Age (per 10y)</b>                     | 1.33 (1.32, 1.34) | <0.001  | 1.38 (1.37, 1.39) | <0.001  | 1.38 (1.37, 1.39) | <0.001  |
| <b>Sex</b>                               |                   |         |                   |         |                   |         |
| Female                                   | Ref               |         |                   |         |                   |         |
| Male                                     | 1.32 (1.26, 1.38) | <0.001  | 1.29 (1.24, 1.36) | <0.001  | 1.29 (1.23, 1.35) | <0.001  |
| <b>Distal variables</b>                  |                   |         |                   |         |                   |         |
| <b>Region of family home</b>             |                   |         |                   |         |                   |         |
| South                                    | Ref               |         |                   |         |                   |         |
| South-east                               | 1.55 (1.35, 1.78) | <0.001  |                   |         |                   |         |
| North-east                               | 5.14 (4.51, 5.87) | <0.001  |                   |         |                   |         |
| North                                    | 8.67 (7.58, 9.94) | <0.001  |                   |         |                   |         |
| Central-West                             | 8.30 (7.23, 9.51) | <0.001  |                   |         |                   |         |
| <b>Location of family home</b>           |                   |         |                   |         |                   |         |
| Rural                                    | Ref               |         |                   |         |                   |         |
| Urban                                    | 1.23 (1.16, 1.31) | <0.001  |                   |         |                   |         |
| <b>Intermediate variables</b>            |                   |         |                   |         |                   |         |
| <b>Ethnicity/skin colour</b>             |                   |         |                   |         |                   |         |
| White                                    |                   |         | Ref               |         |                   |         |
| Preto ("Black")                          |                   |         | 1.46 (1.33, 1.61) | <0.001  |                   |         |
| Pardo ("Brown")                          |                   |         | 1.28 (1.20, 1.36) | <0.001  |                   |         |
| Asian                                    |                   |         | 0.95 (0.64, 1.42) | 0.81    |                   |         |
| Indigenous                               |                   |         | 0.49 (0.33, 0.73) | <0.001  |                   |         |
| <b>Highest level of education***</b>     |                   |         |                   |         |                   |         |
| Higher education                         |                   |         | Ref               |         |                   |         |
| Year 10 to 12                            |                   |         | 1.45 (0.93, 2.25) | 0.102   |                   |         |
| Year 6 to 9                              |                   |         | 1.92 (1.24, 2.98) | 0.003   |                   |         |
| Year 1 to 5                              |                   |         | 2.09 (1.35, 3.24) | 0.001   |                   |         |
| Pre-school or no education or illiterate |                   |         | 2.22 (1.42, 3.45) | <0.001  |                   |         |
| <b>Employment***</b>                     |                   |         |                   |         |                   |         |
| Currently employed                       |                   |         | Ref               |         |                   |         |
| Unemployed student                       |                   |         | 1.06 (0.99, 1.12) | 0.09    |                   |         |
| Unemployed (not student)                 |                   |         | 0.73 (0.68, 0.78) | <0.001  |                   |         |
| <b>Income per capita</b>                 |                   |         |                   |         |                   |         |
| >1 min salary                            |                   |         | Ref               |         |                   |         |
| 0.5-1 min salary                         |                   |         | 0.88 (0.78, 0.99) | 0.04    |                   |         |
| 0.25-0.5 min salary                      |                   |         | 1.12 (0.99, 1.27) | 0.08    |                   |         |
| 0-0.25 min salary                        |                   |         | 1.39 (1.23, 1.57) | <0.001  |                   |         |
| No income                                |                   |         | 1.49 (1.29, 1.71) | <0.001  |                   |         |
| <b>Proximal variables</b>                |                   |         |                   |         |                   |         |
| <b>Housing material</b>                  |                   |         |                   |         |                   |         |
| Brick or cement                          |                   |         |                   |         | Ref               |         |
| Taipa/Wood/Other                         |                   |         |                   |         | 1.32 (1.24, 1.41) | <0.001  |
| <b>Household water supply</b>            |                   |         |                   |         |                   |         |
| Public network                           |                   |         |                   |         | Ref               |         |
| Well/Natural source/Cistern/Other        |                   |         |                   |         | 1.00 (0.93, 1.07) | 0.97    |
| <b>Sewage disposal system</b>            |                   |         |                   |         |                   |         |
| Public network                           |                   |         |                   |         | Ref               |         |

|                                                    |                   |        |
|----------------------------------------------------|-------------------|--------|
| Septic tank/Ditch/Other                            | 1.34 (1.26, 1.42) | <0.001 |
| <b>Electricity in family home</b>                  |                   |        |
| Home counter                                       | Ref               |        |
| Community counter                                  | 1.08 (0.97, 1.22) | 0.31   |
| Illegal electricity/Gas lighting/Candlelight/Other | 1.08 (1.00, 1.16) | 0.06   |
| <b>Waste collection system</b>                     |                   |        |
| Public collection system                           | Ref               |        |
| Burned/Buried/Outdoor disposal/Other               | 1.00 (0.91, 1.09) | 0.93   |
| <b>Density (individuals/room)</b>                  |                   |        |
| <=0.5                                              | Ref               |        |
| 0.5-0.75                                           | 0.96 (0.89, 1.03) | 0.23   |
| 0.75-1.00                                          | 1.00 (0.93, 1.07) | 0.92   |
| >1.00                                              | 0.87 (0.80, 0.94) | 0.001  |

IRR: incidence rate ratio for leprosy new case detection

IRRs were obtained using generalized linear Poisson models with clustered standard errors to account for clustering by family. A complete case analysis approach was adopted excluding individuals with missing data in any of the three models from all models.

\*Model 2: covariates in Model 2 are adjusted for covariates from Model 1 with a p-value<0.1, i.e. Model 2 is adjusted for region and location of family home

\*\*Model 3: covariates from Model 3 are adjusted for covariates from Model 1 and Model 2 with a p-value<0.1, i.e. Model 3 is adjusted for region, location of family home, ethnicity, education, employment, and income

\*\*\*Information on education and employment are reported at the individual level for adult individuals (>18y) and for the oldest member of the family for individuals aged under 18y
